# Supplementary material for: Causes of maternal mortality in Sub-Saharan Africa: A systematic review of studies published from 2015 to 2020
Source: PubMed Central journal article supplement (PMC8542378; doi:10.7189/jogh.11.04048), 2021-10-09
Supplement: jogh-11-04048-s001.pdf [file jogh-11-04048-s001.pdf]

## Online Supplementary Document

Table S1: Detailed search strategy for each search.

|                                                                                                          |                                                                                                                                                                                                                                                                                                                                                                                                                                                                                                                                                                                                                                                                                                                                                                                                                                                                                                                                                                                                                                                                                                                                                                                                                                                                                                                                                                                                                                                                                                                                                                                                                                                                                                                                                                    |
|----------------------------------------------------------------------------------------------------------|--------------------------------------------------------------------------------------------------------------------------------------------------------------------------------------------------------------------------------------------------------------------------------------------------------------------------------------------------------------------------------------------------------------------------------------------------------------------------------------------------------------------------------------------------------------------------------------------------------------------------------------------------------------------------------------------------------------------------------------------------------------------------------------------------------------------------------------------------------------------------------------------------------------------------------------------------------------------------------------------------------------------------------------------------------------------------------------------------------------------------------------------------------------------------------------------------------------------------------------------------------------------------------------------------------------------------------------------------------------------------------------------------------------------------------------------------------------------------------------------------------------------------------------------------------------------------------------------------------------------------------------------------------------------------------------------------------------------------------------------------------------------|
| PubMed search by MeSH terms for articles from Africa (last search date: 21/05/2021)                      | (((((((reproductive age[MeSH Terms]) OR (pregnancy-related[MeSH Terms])) OR (maternal[MeSH Terms])) AND (death[MeSH Terms])) OR (mortality[MeSH Terms])) AND (causes[MeSH Terms])) AND (Africa[MeSH Terms])) AND (("2015/01/01"[Date - Publication] : "2020/12/31"[Date - Publication]))                                                                                                                                                                                                                                                                                                                                                                                                                                                                                                                                                                                                                                                                                                                                                                                                                                                                                                                                                                                                                                                                                                                                                                                                                                                                                                                                                                                                                                                                           |
| PubMed search by MeSH terms for articles by SSA country names, one by one (last search date: 21/05/2021) | (((((((reproductive age[MeSH Terms]) OR (pregnancy-related[MeSH Terms])) OR (maternal[MeSH Terms])) AND (death[MeSH Terms])) OR (mortality[MeSH Terms])) AND (causes[MeSH Terms])) AND (Sub-Saharan Africa country name[MeSH Terms])) AND (("2015/01/01"[Date - Publication] : "2020/12/31"[Date - Publication]))                                                                                                                                                                                                                                                                                                                                                                                                                                                                                                                                                                                                                                                                                                                                                                                                                                                                                                                                                                                                                                                                                                                                                                                                                                                                                                                                                                                                                                                  |
| PubMed search by MeSH terms for articles for all SSA country names (last search date: 21/05/2021)        | ((((((((((((reproductive[MeSH Terms]) OR (pregnancy[MeSH Terms])) OR (maternal[MeSH Terms])) AND (mortality[MeSH Terms])) OR (death[MeSH Terms])) AND (causes[MeSH Terms])) OR (aetiology[MeSH Terms])) AND ("Angola"[Text Word] OR "Botswana"[Text Word] OR "Benin"[Text Word] OR "Burkina Faso"[Text Word] OR "Burundi"[Text Word] OR "Cameroon"[Text Word] OR "Cape Verde"[Text Word] OR "Central African Republic"[Text Word] OR "Chad"[Text Word] OR "Comoros"[Text Word] OR "Cote d'Ivoire"[Text Word] OR "Congo"[Text Word] OR "Congo Brazzaville"[Text Word] OR "Democratic Republic of the Congo"[Text Word] OR "Djibouti"[Text Word] OR "Equatorial Guinea"[Text Word] OR "Eritrea"[Text Word] OR "Ethiopia"[Text Word] OR "Gabon"[Text Word] OR "Ghana"[Text Word] OR "Guinea Bissau"[Text Word] OR "Guinea Conakry"[Text Word] OR "Kenya"[Text Word] OR "Lesotho"[Text Word] OR "Liberia"[Text Word] OR "Madagascar"[Text Word] OR "Malawi"[Text Word] OR "Mali"[Text Word] OR "Mauritania"[Text Word] OR "Mauritius"[Text Word] OR "Mozambique"[Text Word] OR "Namibia"[Text Word] OR "Niger"[Text Word] OR "Nigeria"[Text Word] OR "Reunion"[Text Word] OR "Rwanda"[Text Word] OR "Sao Tome and Principe"[Text Word] OR "Senegal"[Text Word] OR "Seychelles"[Text Word] OR "Sierra Leone"[Text Word] OR "Somalia"[Text Word] OR "South Africa"[Text Word] OR "South Sudan"[Text Word] OR "Sudan"[Text Word] OR "Swaziland"[Text Word] OR "Eswatini"[Text Word] OR "Tanzania"[Text Word] OR "The Gambia"[Text Word] OR "Gambia"[Text Word] OR "Togo"[Text Word] OR "Uganda"[Text Word] OR "Western Sahara"[Text Word] OR "Zambia"[Text Word] OR "Zimbabwe"[Text Word])))) AND (("2015/01/01"[Date - Publication] : "2020/12/31"[Date - Publication])) |
| World Cat Discovery search (last search date: 21/05/2021)                                                | kw:(reproductive) OR kw:(pregnancy) OR kw:(maternal) AND kw:(mortality) OR kw:(death) AND kw:(causes) OR kw:(etiology) AND kw:(Africa) AND (yr:2015..2020).<br>Filters: English language, peer-reviewed articles, all databases, include related terms.                                                                                                                                                                                                                                                                                                                                                                                                                                                                                                                                                                                                                                                                                                                                                                                                                                                                                                                                                                                                                                                                                                                                                                                                                                                                                                                                                                                                                                                                                                            |

|                                                      |                                                                                                                                                                      |
|------------------------------------------------------|----------------------------------------------------------------------------------------------------------------------------------------------------------------------|
| Google Scholar search (last search date: 21/05/2021) | "reproductive age" or "pregnancy related" or "maternal" and "mortality" or "death" and "causes" or "etiology" and "Africa".<br>Filters: time custom range 2015-2020. |
|------------------------------------------------------|----------------------------------------------------------------------------------------------------------------------------------------------------------------------|

Table S2: Data extraction form for systematic review of maternal mortality causes in SSA

| Study details          |                                                                                    |                   |                             |                                                   |                                                                          |                                            |               |                           |                                    |                                                          |               |                                      | 1       |
|------------------------|------------------------------------------------------------------------------------|-------------------|-----------------------------|---------------------------------------------------|--------------------------------------------------------------------------|--------------------------------------------|---------------|---------------------------|------------------------------------|----------------------------------------------------------|---------------|--------------------------------------|---------|
| Author, Year published | Study description                                                                  | Study implementer | Data period                 | Study design                                      | Study setting                                                            | MDs data source                            | MD definition | Community deaths included | Method of assigning cause of death | Country                                                  | Region        | Percent complete cause of death data | Un      |
| Vousden, 2020          | A secondary analysis of a stepped-wedge cluster randomised controlled trial        | Study team        | April 2016 to November 2017 | stepped-wedge cluster randomised controlled trial | secondary or tertiary health facility and peripheral referral facilities | Health facility records and verbal autopsy | ICD-10 MM     | Yes                       | Expert panel                       | Ethiopia, Uganda, Malawi, Sierra Leone, Zambia, Zimbabwe | Multi-country | 100%                                 | Seccati |
| Samuels, 2020          | A study to determine the frequency of maternal near-miss (MNM) and maternal deaths | Study team        | June 2012 to May 2013       | retrospective records review                      | Jos University Teaching Hospital                                         | Health facility records                    | ICD-10 MM     | No                        | Not stated                         | Nigeria                                                  | West Africa   | 100%                                 | ab      |
| Said, 2020             | A cross-sectional study of MDSR reviewed deaths                                    | Study team        | Jan - Dec 2018              | MDSR audits review                                | Lindi and Mtwara regions (Referral, district, mission hospitals)         | MDSR audits and verbal autopsy             | ICD-10 MM     | Yes                       | Expert panel                       | Tanzania                                                 | East Africa   | 100%                                 |         |

|                   |                                                                                         |                       |                     |                                |                                             |                         |            |     |                               |              |                 |      |  |
|-------------------|-----------------------------------------------------------------------------------------|-----------------------|---------------------|--------------------------------|---------------------------------------------|-------------------------|------------|-----|-------------------------------|--------------|-----------------|------|--|
|                   |                                                                                         |                       |                     |                                | and health centres)                         |                         |            |     |                               |              |                 |      |  |
| Nassoro, 2020     | A retrospective review of records in a regional referral hospital                       | Study team            | Jan-Dec 2018        | retrospective records review   | Regional Referral Hospital                  | Health facility records | Not stated | No  | Hospital MDSR committee       | Tanzania     | East Africa     | 100% |  |
| Hadush, 2020      | A national survey of emergency obstetric and newborn care                               | Public institute      | May 2016 - Dec 2016 | cross-sectional facility study | Health facilities in 9 regions              | MDSR audits             | Not stated | No  | Expert panel                  | Ethiopia     | East Africa     | 100% |  |
| Gebretsadik, 2020 | Evaluating the causes and contributors to maternal death at a specialised hospital      | Study team            | Jan 2016 - Aug 2017 | retrospective records review   | Hawassa Comprehensive Specialised Hospital, | Health facility records | ICD-10 MM  | No  | Expert panel                  | Ethiopia     | East Africa     | 100% |  |
| RSA NCCEMD, 2017  | Vital registration and NCCEMD data                                                      | Government department | 2015-16             | CEMD and VR                    | National                                    | CEMD audits             | ICD-10 MM  | Yes | CEMD                          | South Africa | Southern Africa | 100% |  |
| Zim MDSR, 2019    | MPDSR national reports, 2016-2018; 2019                                                 | Government department | 2016-2019           | MDSR audits review             | National                                    | MDSR audits             | ICD-10 MM  | Yes | MDSR audits                   | Zimbabwe     | Southern Africa | 81%  |  |
| Bwana, 2019       | Maternal mortality causes and trends in public hospitals                                | Study team            | 2011-2015           | retrospective records review   | 34 hospitals -national, zonal and regional  | Health facility records | ICD-10 MM  | No  | Expert panel                  | Tanzania     | East Africa     | 100% |  |
| Diallo, 2020      | Maternal mortality risk indicators: Case-control study at a referral hospital in Guinea | Study team            | Jan 2016 - Oct 2017 | retrospective records review   | Gnace Deen National Hospital in Conakry     | Health facility records | Not stated | No  | Facility clinical assessments | Guinea       | West Africa     | 99%  |  |

|                  |                                                                                                                        |            |                                            |                              |                                                           |                                                         |            |    |                               |              |                 |      |
|------------------|------------------------------------------------------------------------------------------------------------------------|------------|--------------------------------------------|------------------------------|-----------------------------------------------------------|---------------------------------------------------------|------------|----|-------------------------------|--------------|-----------------|------|
| Ngwenya, 2020    | Factors associated with maternal mortality from sepsis: a five-year review                                             | Study team | Jan 2012- Dec 2016                         | retrospective records review | Mpilo Central Hospital, Bulawayo                          | Health facility records                                 | Not stated | No | Facility clinical assessments | Zimbabwe     | Southern Africa | 100% |
| Uchendu, 2020    | Mortality synopsis Among women of reproductive age group                                                               | Study team | Jan 2016 - Dec 2018                        | retrospective records review | Delta State university Teaching Hospital                  | Health facility records                                 | ICD-10 MM  | No | Expert panel                  | Nigeria      | West Africa     | 100% |
| Uzabakirho, 2019 | Causes of maternal deaths at Natalspruit Hospital,                                                                     | Study team | Jan 2013 to Dec 2014                       | retrospective records review | Natalspruit Hospital, Johannesburg,                       | Health facility records                                 | ICD-10 MM  | No | Expert panel                  | South Africa | Southern Africa | 100% |
| Sageer, 2019     | Causes and contributory factors of maternal mortality after state-wide MPDSR review                                    | Study team | Jan 2015 to Dec 2016                       | retrospective records review | Ogun State in South western Nigeria                       | MDSR audits                                             | ICD-10 MM  | No | MDSR committees               | Nigeria      | West Africa     | 100% |
| Oyeneyin, 2019   | Maternal mortality ratios, causes of deaths, geographical distribution and associated factors in 12-month CEMD reports | Study team | June 2012 to May 2015                      | retrospective records review | Ondo State                                                | Confidential Enquiry into Maternal Deaths (CEMD) audits | ICD-10 MM  | No | Expert panel                  | Nigeria      | West Africa     | 100% |
| Nkhwalume, 2019  | Trends of MMR at Princess Marina and Nyangabwe referral hospitals, before                                              | Study team | Sept 2010 - Dec 2011; Sept 2012 - Dec 2013 | Pre and Post evaluation      | two national referral hospitals in Gaborone and Nyangabwe | Health facility records                                 | Not stated | No | Facility audit teams          | Botswana     | Southern Africa | 100% |

|                  |                                                                                                                                            |            |                       |                                                 |                                      |                         |            |     |                               |                                               |               |      |  |
|------------------|--------------------------------------------------------------------------------------------------------------------------------------------|------------|-----------------------|-------------------------------------------------|--------------------------------------|-------------------------|------------|-----|-------------------------------|-----------------------------------------------|---------------|------|--|
|                  | and after EMOC training                                                                                                                    |            |                       |                                                 |                                      |                         |            |     |                               |                                               |               |      |  |
| Aikpitanyi, 2019 | Medical causes and contributory factors of maternal mortality from MPDSR at the Central Hospital                                           | Study team | Oct 2017 to May 2019  | retrospective records review                    | Benin city central hospital          | Health facility records | Not stated | No  | Facility MPDSR committee      | Nigeria                                       | West Africa   | 100% |  |
| Aden, 2019       | Causes and contributing factors of maternal deaths                                                                                         | Study team | Jan-Dec 2016          | retrospective records review and verbal autopsy | Bosaso District, Puntland State      | Health facility records | ICD-10 MM  | No  | Expert panel                  | Somalia                                       | East Africa   | 100% |  |
| Zamane, 2018     | Causes of maternal deaths in the Dori Regional Hospital                                                                                    | Study team | Jan 2014 to Dec 2016  | retrospective records review                    | Dori hospital, Regional Hospital     | Health facility records | Not stated | No  | Facility clinical assessments | Burkina Faso                                  | West Africa   | 100% |  |
| Imran, 2018      | Population-based rates, timing, and causes of maternal deaths, stillbirths, and neonatal deaths in south Asia and sub-Saharan Africa (SSA) | Study team | July 2012 to Feb 2016 | Prospective cohort study                        | 6 SSA countries                      | Verbal autopsy          | ICD-10 MM  | Yes | Expert panel                  | SSA (DRC, Ghana, Kenya, Tanzania, and Zambia) | Multi-country | 100% |  |
| Awowole, 2018    | Maternal mortality analysis at a university teaching hospital                                                                              | Study team | Oct 2012 to Sept 2015 | retrospective records review                    | Obafemi Awolowo University Hospitals | Health facility records | ICD-10 MM  | No  | Expert panel                  | Nigeria                                       | West Africa   | 100% |  |
| Agan, 2018       | Trends and causes of maternal                                                                                                              | Study team | 2010 to 2014          | retrospective records review                    | University of Calabar Teaching       | Health facility records | ICD-10 MM  | No  | Expert panel                  | Nigeria                                       | West Africa   | 100% |  |

|                     |                                                                                          |            |                      |                              |                                                                   |                         |            |    |                               |          |             |      |  |
|---------------------|------------------------------------------------------------------------------------------|------------|----------------------|------------------------------|-------------------------------------------------------------------|-------------------------|------------|----|-------------------------------|----------|-------------|------|--|
|                     | mortality in a tertiary hospital: A 5-year retrospective study                           |            |                      |                              | Hospital, Calabar, Nigeria                                        |                         |            |    |                               |          |             |      |  |
| Ntoimo, 2018        | Prevalence and risk factors for maternal mortality in referral hospitals in eight states | Study team | Jan – Jun 2014       | retrospective records review | national multi-center study conducted in eight referral hospitals | Health facility records | ICD-10 MM  | No | Facility clinical assessments | Nigeria  | West Africa | 99%  |  |
| Okonofua, 2017      | Maternal death review and outcomes assessment in Lagos                                   | Study team | Jan 2015 - Sept 2016 | retrospective records review | three public maternity hospitals - AGH, GGH and LIMH              | MDSR audits             | ICD-10 MM  | No | MPDSR committees              | Nigeria  | West Africa | 100% |  |
| Kamga, 2017         | Role of abortion and ectopic pregnancies in maternal mortality rate at                   | Study team | Jun 2011 to May 2016 | retrospective records review | Three hospitals in the city of Yaoundé: HCY, CHU, HGOPY.          | Health facility records | Not stated | No | Facility clinical assessments | Cameroon | West Africa | 100% |  |
| Idoko, 2017         | A retrospective analysis of trends in maternal mortality in tertiary health centre       | Study team | Jan 2011 - Dec 2014  | retrospective records review | Edward Francis Small Teaching Hospital                            | Health facility records | WHO ICD MM | No | Expert panel                  | Gambia   | West Africa | 96%  |  |
| Owusu-Sarpong, 2017 | Associated factors and quality of care among maternal deaths at a regional hospital      | Study team | Jan-Dec 2012         | retrospective records review | The Eastern Regional hospital                                     | Maternal death audits   | Not stated | No | Expert panel                  | Ghana    | West Africa | 100% |  |

|                 |                                                                                             |                 |                      |                                    |                                                           |                                            |           |     |                           |         |                 |      |
|-----------------|---------------------------------------------------------------------------------------------|-----------------|----------------------|------------------------------------|-----------------------------------------------------------|--------------------------------------------|-----------|-----|---------------------------|---------|-----------------|------|
| Orazulike, 2017 | Study of mortality in women of reproductive age in a tertiary health facility               | Study team      | Jan 2013- Dec 2015   | retrospective records review       | University of Port Harcourt Teaching Hospital             | Health facility records                    | ICD-10 MM | No  | Expert panel              | Nigeria | West Africa     | 100% |
| Umar, 2016      | Maternal Mortality in the main referral hospital                                            | Study team      | 2010 to 2014         | retrospective records review       | Kuando Kubango province                                   | Health facility records                    | ICD-10 MM | No  | Not stated                | Angola  | Southern Africa | 76%  |
| Ngonzi, 2016    | Analysis of the leading cause of maternal deaths at a tertiary university Teaching Hospital | Study team      | Jan 2011 - Nov 2014  | case-control study                 | Mbarara Regional Referral Hospital (MRRH), Sothern Uganda | Health facility records                    | ICD-10 MM | No  | Not stated                | Uganda  | East Africa     | 99%  |
| Sayinzoga, 2016 | Nationwide facility-based retrospective cohort study of maternal deaths                     | Govt department | Jan 2010 - Dec 2013  | MDSR audits                        | national study                                            | MDSR audits                                | ICD-10 MM | No  | District audit committees | Rwanda  | East Africa     | 100% |
| Mgawadere, 2016 | Measuring maternal mortality using a Reproductive Age Mortality Study (RAMOS)               | Study team      | Dec 2011 to Nov 2012 | RAMOS facility and community study | Mangochi District                                         | Health facility records and verbal autopsy | ICD-10 MM | Yes | Expert panel              | Malawi  | Southern Africa | 100% |
| Adomako, 2016   | Community-based surveillance of maternal deaths in rural Ghana                              | Study team      | May and Aug 2013     | RAMOS facility / community study   | Bosomtwe district                                         | Verbal autopsy                             | ICD-10 MM | Yes | Expert panel              | Ghana   | West Africa     | 100% |
| Oladapo, 2015   | Nationwide cross-sectional study of maternal deaths                                         | Study team      | Jun 2012 to Aug 2013 | cross-sectional facility study     | 46 public tertiary hospitals in the six geopolitical      | Health facility records                    | ICD-10 MM | No  | Expert panel              | Nigeria | West Africa     | 100% |





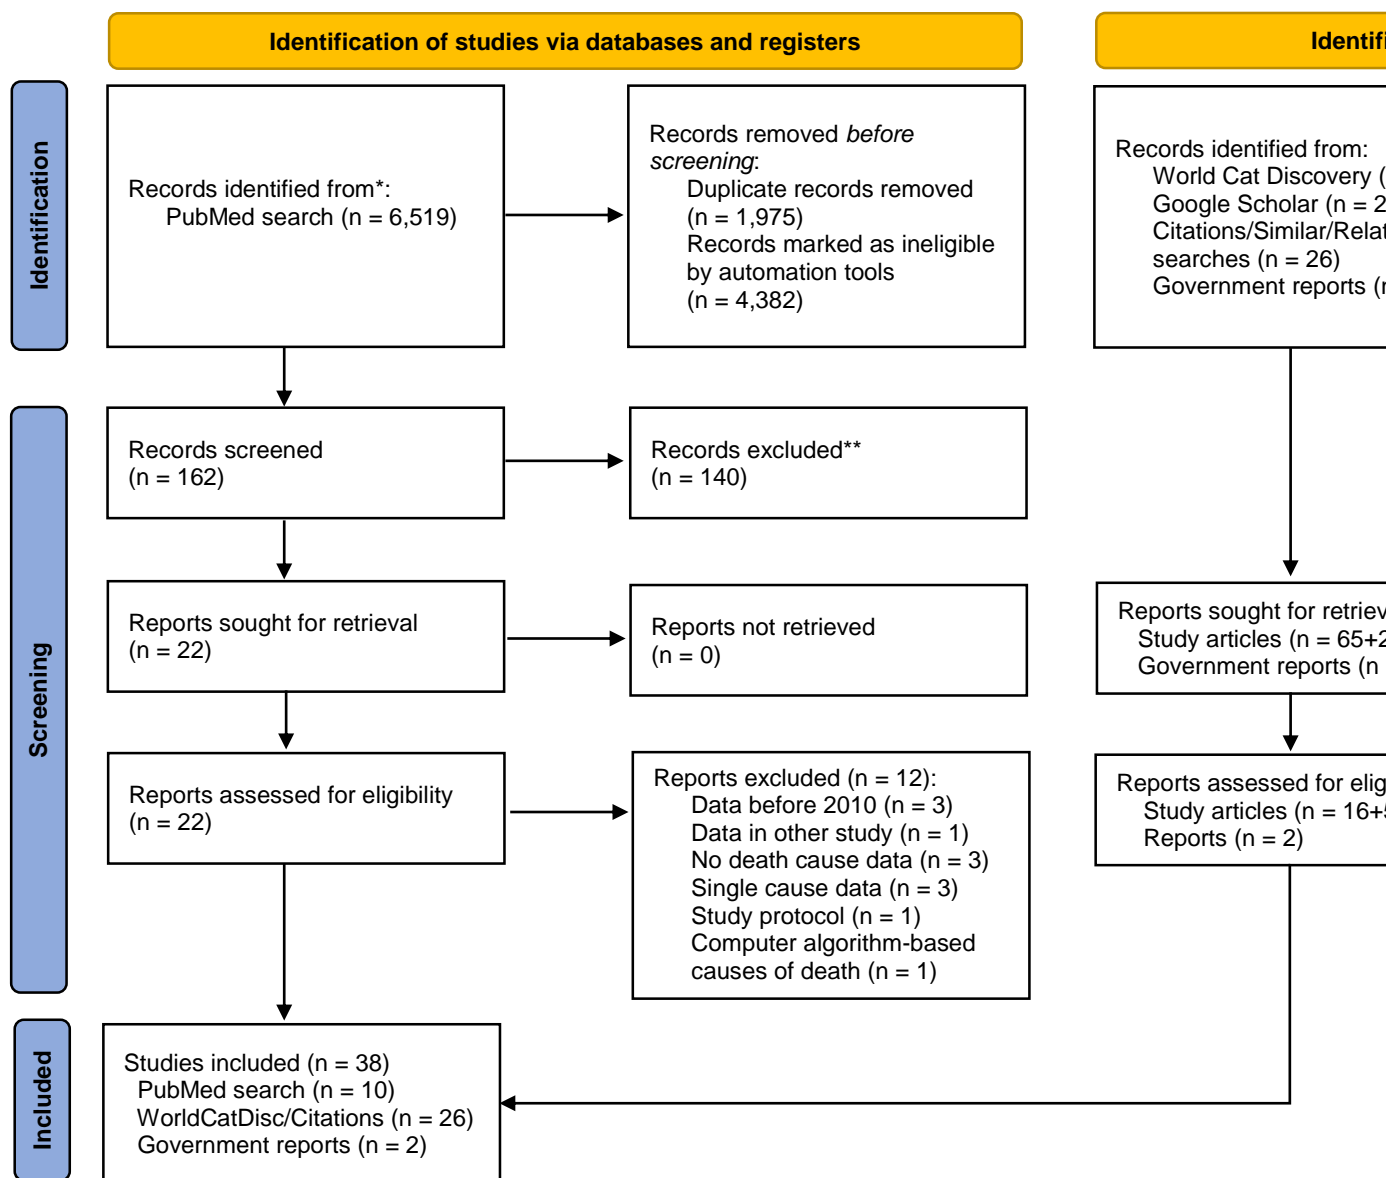

Figure 1.

Table S3: Risk of bias assessment in the studies reporting maternal mortality causes in sub-Saharan Africa, 2015-2020.

| Study             | Risk of bias and rating for each criteria (risk rating) |                                                         |                                                      |                                                                |                   |
|-------------------|---------------------------------------------------------|---------------------------------------------------------|------------------------------------------------------|----------------------------------------------------------------|-------------------|
|                   | Source of data (information bias)                       | Completeness of cause-of-death data (missing data bias) | Method of assigning causes of death (selection bias) | Competence in assigning the causes of death (measurement bias) | Overall (average) |
| Vousden, 2020.    | Health facility records and verbal autopsy (1)          | 100% (1)                                                | ICD-MM (1)                                           | Study expert panel (1)                                         |                   |
| Samuels, 2020     | Health facility records (1)                             | 100% (1)                                                | ICD-MM (1)                                           | Not stated (3)                                                 | M                 |
| Said, 2020        | MDSR audits and verbal autopsy (2)                      | 100% (1)                                                | ICD-MM (1)                                           | Study expert panel (1)                                         | (                 |
| Nassoro, 2020     | Health facility records (1)                             | 100% (1)                                                | Not stated (2)                                       | Hospital MDSR committee (1)                                    | (                 |
| Hadush, 2020      | MDSR audits (2)                                         | 100% (1)                                                | Not stated (2)                                       | Study expert panel (1)                                         | M                 |
| Gebretsadik, 2020 | Health facility records (1)                             | 100% (1)                                                | ICD-MM (1)                                           | Study team (1)                                                 |                   |
| RSA, NCCEMD, 2017 | CEMD audits (2)                                         | 100% (1)                                                | ICD-MM (1)                                           | CEMD (1)                                                       | (                 |
| Zim MDSR, 2019    | MDSR audits (2)                                         | 81% (2)                                                 | ICD-MM (1)                                           | MDSR audits (1)                                                | M                 |
| Bwana, 2019       | Health facility records (1)                             | 100% (1)                                                | ICD-MM (1)                                           | Study expert panel (1)                                         |                   |
| Diallo, 2020      | Health facility records (1)                             | 99% (1)                                                 | Not stated (2)                                       | Facility clinical assessments (2)                              | M                 |
| Ngwenya, 2020     | Health facility records (1)                             | 100% (1)                                                | Not stated (3)                                       | Facility clinical assessments (2)                              | M<br>(            |
| Uchendu, 2020     | Health facility records (1)                             | 100% (1)                                                | ICD-MM (1)                                           | Study expert panel (1)                                         |                   |
| Uzabakiriho, 2019 | Health facility records (1)                             | 100% (1)                                                | ICD-MM (1)                                           | Study expert panel (1)                                         |                   |
| Sageer, 2019      | MDSR audits (2)                                         | 100% (1)                                                | ICD-MM (1)                                           | MDSR committees (1)                                            | (                 |

| Study               | Risk of bias and rating for each criteria (risk rating) |                                                         |                                                      |                                                                |                   |
|---------------------|---------------------------------------------------------|---------------------------------------------------------|------------------------------------------------------|----------------------------------------------------------------|-------------------|
|                     | Source of data (information bias)                       | Completeness of cause-of-death data (missing data bias) | Method of assigning causes of death (selection bias) | Competence in assigning the causes of death (measurement bias) | Overall (average) |
| Oyenehin, 2019      | CEMD audits (2)                                         | 100% (1)                                                | ICD-MM (1)                                           | Study expert panel (1)                                         | (                 |
| Nkhwelume, 2019     | Health facility records (1)                             | 100% (1)                                                | Not stated (3)                                       | Facility audit teams (1)                                       | M                 |
| Aikpitanyi, 2019    | Health facility records (1)                             | 100% (1)                                                | Not stated (2)                                       | Facility audit teams (1)                                       | (                 |
| Aden, 2019          | Health facility records (1)                             | 100% (1)                                                | ICD-MM (1)                                           | Study expert panel (1)                                         |                   |
| Zamane, 2018        | Health facility records (1)                             | 100% (1)                                                | Not stated (2)                                       | Facility clinical assessments (2)                              | M                 |
| Imran, 2018         | Verbal autopsy (3)                                      | 100% (1)                                                | ICD-MM (1)                                           | Physician verbal autopsy coders (1)                            | M                 |
| Awowole, 2018       | Health facility records (1)                             | 100% (1)                                                | ICD-MM (1)                                           | Study expert panel (1)                                         |                   |
| Agan, 2018          | Health facility records (1)                             | 100% (1)                                                | ICD-MM (1)                                           | Study expert panel (1)                                         |                   |
| Ntoimo, 2018        | Health facility records (1)                             | 99% (1)                                                 | ICD-MM (1)                                           | Facility clinical assessments (2)                              | (                 |
| Okonofua, 2017      | MDSR audits (2)                                         | 100% (1)                                                | ICD-MM (1)                                           | MPDSR committees (1)                                           | M<br>(            |
| Kamga, 2017         | Health facility records (1)                             | 100% (1)                                                | Not stated (3)                                       | Facility clinical assessments (1)                              | M                 |
| Idoko, 2017         | Health facility records (1)                             | 96% (1)                                                 | WHO ICD MM (1)                                       | Study expert panel (1)                                         |                   |
| Owusu-Sarpong, 2017 | Maternal death audits (1)                               | 100% (1)                                                | Not stated (3)                                       | Study expert panel (1)                                         | M                 |
| Orazulike, 2017     | Health facility records (1)                             | 100% (1)                                                | ICD-MM (1)                                           | Study expert panel (1)                                         |                   |
| Umar, 2016          | Health facility records (1)                             | 76% (1)                                                 | ICD-MM (1)                                           | Not stated (3)                                                 | M                 |
| Ngonzi, 2016        | Health facility records (1)                             | 99% (1)                                                 | ICD-MM (1)                                           | Not stated (3)                                                 | M                 |

| Study                    | Risk of bias and rating for each criteria (risk rating) |                                                         |                                                      |                                                                |                   |
|--------------------------|---------------------------------------------------------|---------------------------------------------------------|------------------------------------------------------|----------------------------------------------------------------|-------------------|
|                          | Source of data (information bias)                       | Completeness of cause-of-death data (missing data bias) | Method of assigning causes of death (selection bias) | Competence in assigning the causes of death (measurement bias) | Overall (average) |
| Sayinzoga, 2016          | MDSR audits (2)                                         | 100% (1)                                                | ICD-MM (1)                                           | District audit committee (1)                                   | (                 |
| Mgawadere Florence, 2016 | Health facility records and verbal autopsy (1)          | 100% (1)                                                | ICD-MM (1)                                           | Study expert panel (1)                                         |                   |
| Adomako, 2016            | Verbal autopsy (3)                                      | 100% (1)                                                | ICD-MM (1)                                           | Study expert panel (1)                                         | M                 |
| Oladapo, 2015            | Health facility records (1)                             | 100% (1)                                                | ICD-MM (1)                                           | Study expert panel (1)                                         |                   |

Table S4: Number of studies reporting causes of maternal mortality in sub-Saharan Africa, by country of study, 2015-2020.

| Country      | Number of studies | Number of maternal deaths | Proportion of deaths | Country            | Number of studies | Number of maternal deaths | Proportion of deaths |
|--------------|-------------------|---------------------------|----------------------|--------------------|-------------------|---------------------------|----------------------|
| Angola       | 1                 | 99                        | 1%                   | Multi-country*     | 1                 | 940                       | 8%                   |
| Botswana     | 1                 | 74                        | 1%                   | Multi-country†     | 1                 | 213                       | 2%                   |
| Burkina Faso | 1                 | 141                       | 1%                   | Nigeria            | 13                | 1996                      | 18%                  |
| Cameroon     | 1                 | 414                       | 4%                   | Rwanda             | 2                 | 863                       | 8%                   |
| Ethiopia     | 3                 | 720                       | 6%                   | Somalia            | 1                 | 30                        | 0%                   |
| Gambia       | 1                 | 316                       | 3%                   | South Africa       | 2                 | 2405                      | 21%                  |
| Ghana        | 2                 | 101                       | 1%                   | Tanzania           | 3                 | 1727                      | 15%                  |
| Guinea       | 1                 | 126                       | 1%                   | Uganda             | 1                 | 138                       | 1%                   |
| Malawi       | 1                 | 86                        | 1%                   | Zimbabwe           | 2                 | 1072                      | 9%                   |
|              |                   |                           |                      | <b>Grand Total</b> | <b>38</b>         | <b>11431</b>              | <b>100%</b>          |

\* Ethiopia, Uganda, Malawi, Sierra Leone, Zambia, Zimbabwe

† Democratic Republic of Congo, Ghana, Kenya, Tanzania, Zambia

Table S5: Distribution of deaths by specific cause in studies reporting causes of maternal deaths in sub-Saharan Africa, 2015-2020.

| Cause of death *                                          | Number | Proportion of deaths | Lower limit | Upper limit |
|-----------------------------------------------------------|--------|----------------------|-------------|-------------|
| <b>Group 1: Pregnancies with abortive outcome</b>         |        |                      |             |             |
| Unsafe/septic /complications of abortion                  | 643    | 0.06                 | 0.04        | 0.07        |
| Ectopic Pregnancy                                         | 182    | 0.02                 | 0.00        | 0.03        |
| <b>Group 2: Hypertensive disorders in pregnancy</b>       |        |                      |             |             |
| hypertensive disease in pregnancy                         | 1238   | 0.11                 | 0.09        | 0.13        |
| Severe/Pre-eclampsia/Eclampsia                            | 1283   | 0.11                 | 0.08        | 0.14        |
| <b>Group 3: Obstetric haemorrhage</b>                     |        |                      |             |             |
| Obstetric haemorrhage                                     | 1282   | 0.11                 | 0.08        | 0.14        |
| Postpartum haemorrhage/PPH                                | 1533   | 0.13                 | 0.11        | 0.16        |
| Antepartum haemorrhage/APH                                | 156    | 0.01                 | 0.00        | 0.04        |
| Ruptured uterus                                           | 323    | 0.03                 | 0.01        | 0.05        |
| <b>Group 4: Pregnancy-related infections</b>              |        |                      |             |             |
| Pregnancy-related infections                              | 227    | 0.02                 | 0.00        | 0.06        |
| Puerperal Sepsis                                          | 1091   | 0.10                 | 0.08        | 0.11        |
| <b>Group 5: Other obstetric complications</b>             |        |                      |             |             |
| Obstructed/prolonged labor                                | 207    | 0.02                 | 0.00        | 0.04        |
| Obstetric embolism                                        | 150    | 0.01                 | 0.00        | 0.04        |
| Peripartum cardiomyopathy                                 | 25     | 0.00                 | 0.00        | 0.02        |
| Other direct causes                                       | 194    | 0.02                 | 0.00        | 0.04        |
| <b>Group 6: Unanticipated complications of management</b> |        |                      |             |             |
| Anesthetic complications/High spinal anesthesia           | 113    | 0.01                 | 0.00        | 0.03        |
| Medical and surgical disorders                            | 339    | 0.03                 | 0.00        | 0.07        |
| Anaemia/severe anaemia                                    | 395    | 0.03                 | 0.02        | 0.05        |
| <b>Group 7: Non-obstetric complications</b>               |        |                      |             |             |
| Heart disease/Cardiac disease                             | 88     | 0.01                 | 0.00        | 0.03        |
| HIV/AIDS                                                  | 164    | 0.01                 | 0.00        | 0.03        |
| Malaria                                                   | 144    | 0.01                 | 0.00        | 0.03        |
| Pneumonia/Jirovecii pneumonia                             | 46     | 0.00                 | 0.00        | 0.02        |
| Non-pregnancy related infections                          | 635    | 0.06                 | 0.00        | 0.21        |
| Other indirect causes                                     | 679    | 0.06                 | 0.04        | 0.08        |
| <b>Group 8: Unknown/undetermined causes</b>               |        |                      |             |             |
| Unknown/unspecified causes                                | 289    | 0.025                | 0.02        | 0.05        |
| <b>Group 9: Coincidental causes</b>                       |        |                      |             |             |
| Incidental                                                | 4      | 0.00                 | 0.00        | 0.02        |

\* Some of the causes are stated in the alternative ways that they were given in the studies
